# Supplementary material
Source: PubMed Central journal article supplement (PMC5615183)
Supplement: MCB.00264-17_zmb999101627s1.pdf [file MCB.00264-17_zmb999101627s1.pdf]

## Supplementary figure 1

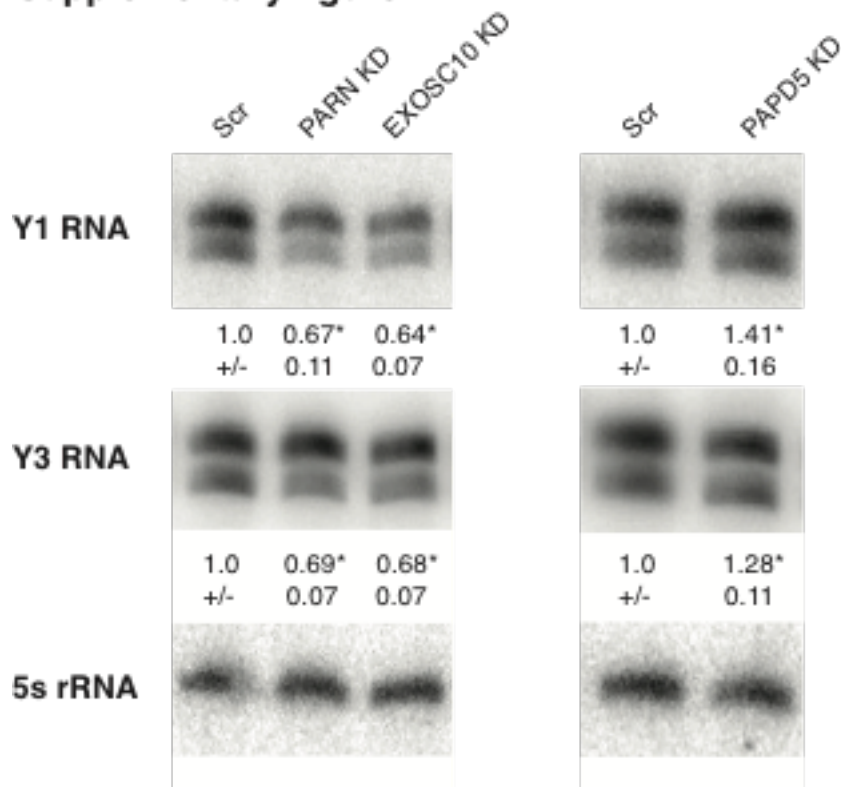

**Supplementary figure 1. Effect on Y RNA levels upon PARN, EXOSC10 or PAPD5 knockdown is siRNA-independent.** Representative northern blots depicting steady state levels of Y1 and Y3 RNA in control and PARN KD, EXOSC10 KD and PAPD5 KD cells. RNA levels were normalized to 5s rRNA loading control (Average +/- S.D. for three biological replicates). \*P<0.05. Individual knockdowns were compared to Scr.
